# Supplementary material
Source: Royal Society of Chemistry journal article supplement (doi:10.1039/d6ma00391e)
Supplement: d6ma00391e1.pdf [file d6ma00391e1.pdf]

## Supporting Information

### Electrochemical behavior of rapid-synthesized amorphous aerogel 3d-VIIIB-metal aerogels as bifunctional electrocatalysts for water splitting

Thi Kim Cuong Phu,<sup>a</sup> Ngoc-Trung Nguyen,<sup>a</sup> Phi Long Nguyen,<sup>a,b</sup> Ngan Nguyen Le,<sup>c,d\*</sup> and Thi Viet Bac Phung<sup>a,e\*</sup>

<sup>a</sup> Center for Environmental Intelligence, VinUniversity, Hanoi, Vietnam

<sup>b</sup> School of Electrical and Electronic Engineering, Hanoi University of Industry, Hanoi, Vietnam

<sup>c</sup> Institute of Applied Science and Technology, Van Lang School of Technology, Van Lang University, Ho Chi Minh City, Vietnam

<sup>d</sup> Faculty of Applied Technology, Van Lang School of Technology, Van Lang University, Ho Chi Minh City, Vietnam

<sup>e</sup> College of Engineering and Computer Science, VinUniversity, Hanoi, Vietnam

#### \*Corresponding author:

Thi Viet Bac Phung; E-mail: [bac.ptv@vinuni.edu.vn](mailto:bac.ptv@vinuni.edu.vn)

Ngan Nguyen Le; E-mail: [ngan.ln@vlu.edu.vn](mailto:ngan.ln@vlu.edu.vn)

## Table of Contents

|                                                                                                                                                                                                                                                                                                                                                                                                                                                                                                                        |    |
|------------------------------------------------------------------------------------------------------------------------------------------------------------------------------------------------------------------------------------------------------------------------------------------------------------------------------------------------------------------------------------------------------------------------------------------------------------------------------------------------------------------------|----|
| Figure S1. XPS C1s spectra of as-prepared catalysts. ....                                                                                                                                                                                                                                                                                                                                                                                                                                                              | 4  |
| Figure S2. Adsorption-desorption pore-size distribution curves of as-prepared catalysts. ....                                                                                                                                                                                                                                                                                                                                                                                                                          | 5  |
| Figure S3. Schematic illustration of the fitted values of $R_S$ , $R_{tr}$ , and $R_{ct}$ corresponding to series resistance, catalyst/catalyst interfacial resistance, and charge transfer resistance at the electrode/electrolyte interface, respectively. ....                                                                                                                                                                                                                                                      | 6  |
| Figure S4. Short-term chronopotentiograms collected at different current densities of carbon cloth in (a) OER + 0.5 M KOH pH = 13.2, (b) OER + 0.5 M PBS pH = 7, (c) HER + 0.5 M KOH pH = 13.2, and (d) HER + 0.5 M PBS pH = 7.....                                                                                                                                                                                                                                                                                    | 7  |
| Figure S5. Cyclic voltammograms ( $v = 5 \text{ mV s}^{-1}$ ; 3 <sup>rd</sup> scan) without $iR_S$ correction applied of as-prepared catalysts of OER (a) in 0.5 M KOH (pH = 13.2) and (b) in 0.5 M PBS (pH = 7) and of HER (c) in 0.5 M KOH (pH = 13.2) and (d) in 0.5 M PBS (pH = 7).....                                                                                                                                                                                                                            | 8  |
| Figure S6. Tafel slopes of as-prepared catalysts of HER (a) in 0.5 M KOH (pH = 13.2) and (b) in 0.5 M PBS (pH = 7) and of OER (c) in 0.5 M KOH (pH = 13.2) and (d) in 0.5 M PBS (pH = 7). 9                                                                                                                                                                                                                                                                                                                            | 9  |
| Figure S7. CV curves of as-prepared catalysts recorded at different scan rates (2; 5; 10; 15; 20; and $25 \text{ mV s}^{-1}$ ) in the non-faradaic potential range for (a) Fe aerogel; (b) Co aerogel; and (c) Ni aerogel. Corresponding double-layer capacitance for (d) Fe aerogel; (e) Co aerogel; and (f) Ni aerogel. Note: Electrolyte is 0.5 M KOH (pH = 13.2). Potentials are not corrected for ohmic losses. Currents are normalized to the geometric surface area of the electrodes ( $1 \text{ cm}^2$ )..... | 10 |
| Figure S8. CV curves of as-prepared catalysts recorded at different scan rates (2; 5; 10; 15; 20; and $25 \text{ mV s}^{-1}$ ) in the non-faradaic potential range for (a) Fe aerogel; (b) Co aerogel; and (c) Ni aerogel. Corresponding double-layer capacitance for (d) Fe aerogel; (e) Co aerogel; and (f) Ni                                                                                                                                                                                                       |    |

aerogel. Note: Electrolyte is 0.5 M PBS (pH = 7). Potentials are not corrected for ohmic losses.  
 Currents are normalized to the geometric surface area of the electrodes (1 cm<sup>2</sup>). .....11

Figure S9. Electrochemical active surface area of as prepared catalysts in (a) 0.5 M KOH and (b) 0.5 M PBS.....12

Table S1. BET adsorption-desorption parameters of as-prepared catalysts. ....13

Table S2. The fitted parameters of Nyquist plot of the as-prepared catalysts in OER with alkaline electrolyte. ....14

Table S3. The fitted parameters of Nyquist plot of the as-prepared catalysts in OER with neutral electrolyte. ....15

Table S4. The fitted parameters of Nyquist plot of the as-prepared catalysts in HER with alkaline electrolyte. ....16

Table S5. The fitted parameters of Nyquist plot of the as-prepared catalysts in HER with neutral electrolyte. ....17

Table S6. Performance comparison of different reported Co-based catalysts for OER in alkaline electrolyte. ....18

References.....22

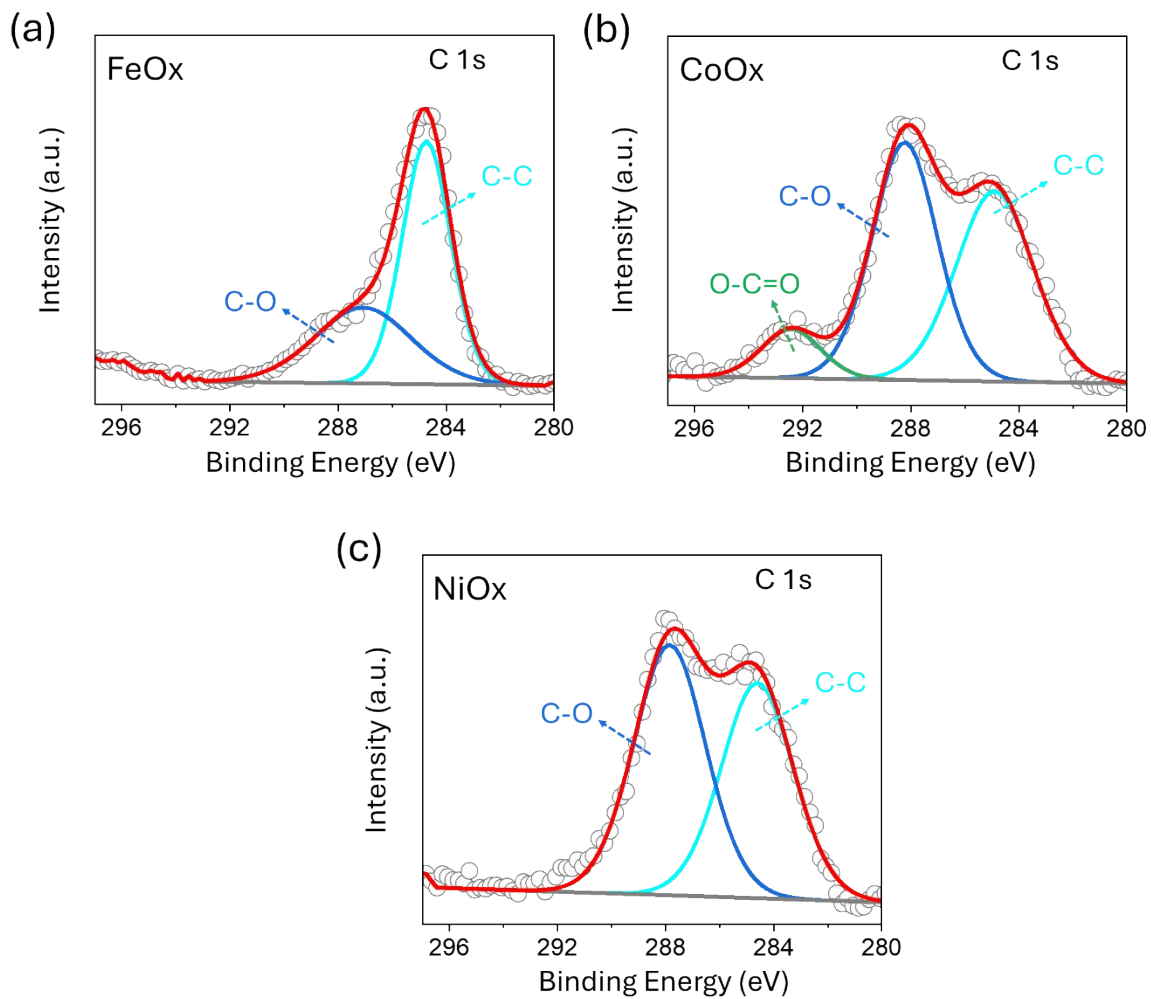

**Figure S1.** XPS C 1s spectra of as-prepared catalysts.

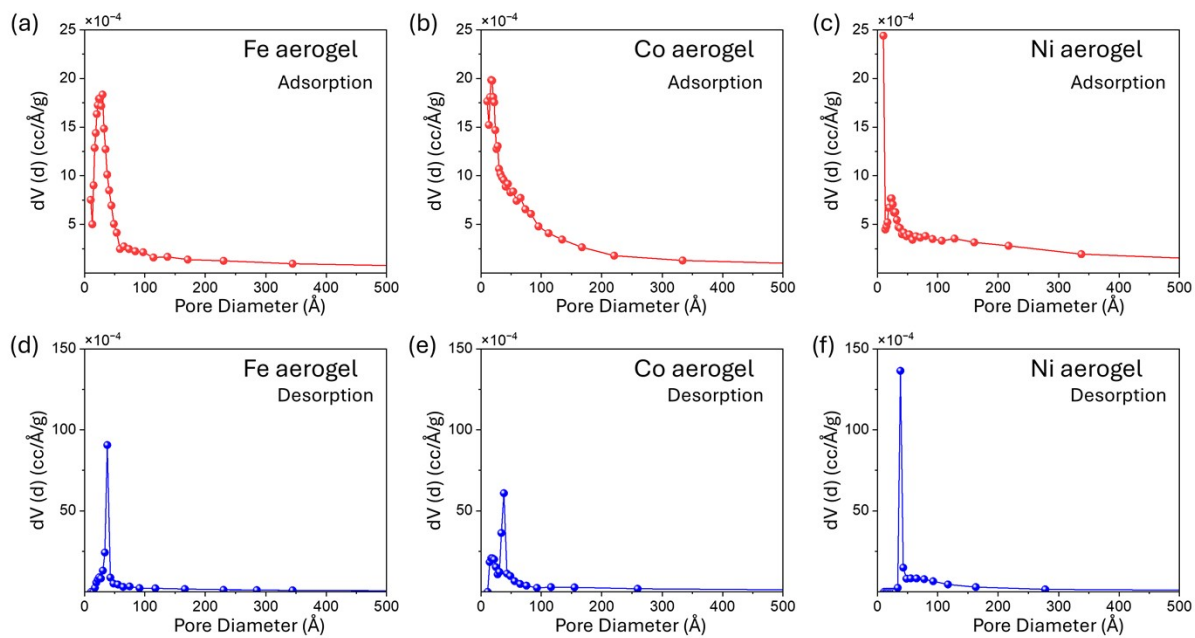

**Figure S2.** Adsorption-desorption pore-size distribution curves of as-prepared catalysts.

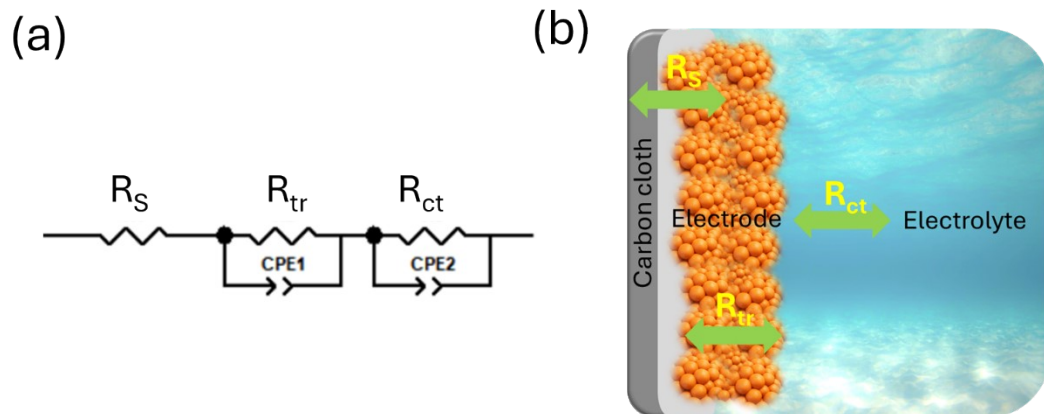

**Figure S3.** Schematic illustration of the fitted values of  $R_S$ ,  $R_{tr}$ , and  $R_{ct}$  corresponding to series resistance, catalyst/catalyst interfacial resistance, and charge transfer resistance at the electrode/electrolyte interface, respectively.

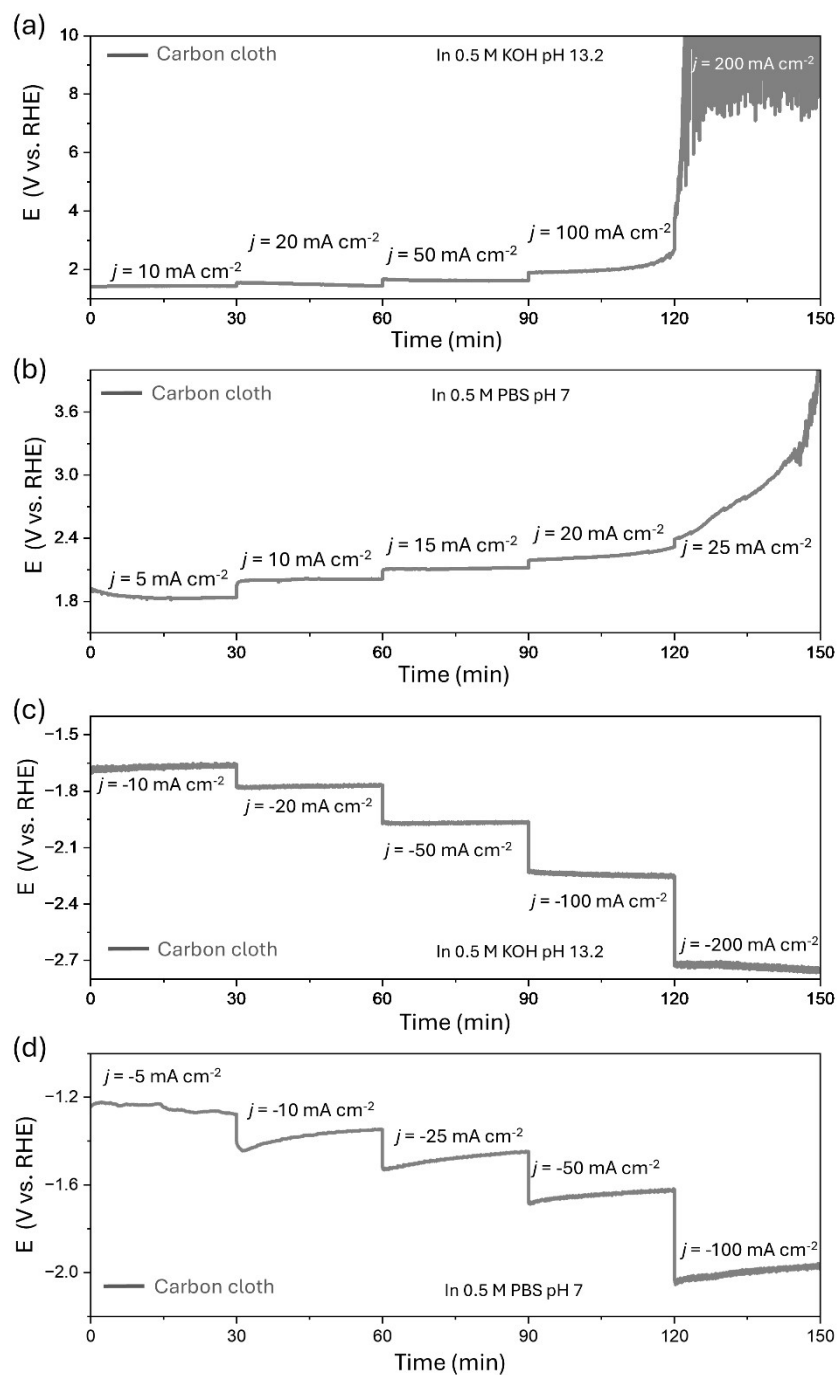

**Figure S4.** Short-term chronopotentiograms collected at different current densities of carbon cloth in (a) OER + 0.5 M KOH pH = 13.2, (b) OER + 0.5 M PBS pH = 7, (c) HER + 0.5 M KOH pH = 13.2, and (d) HER + 0.5 M PBS pH = 7.

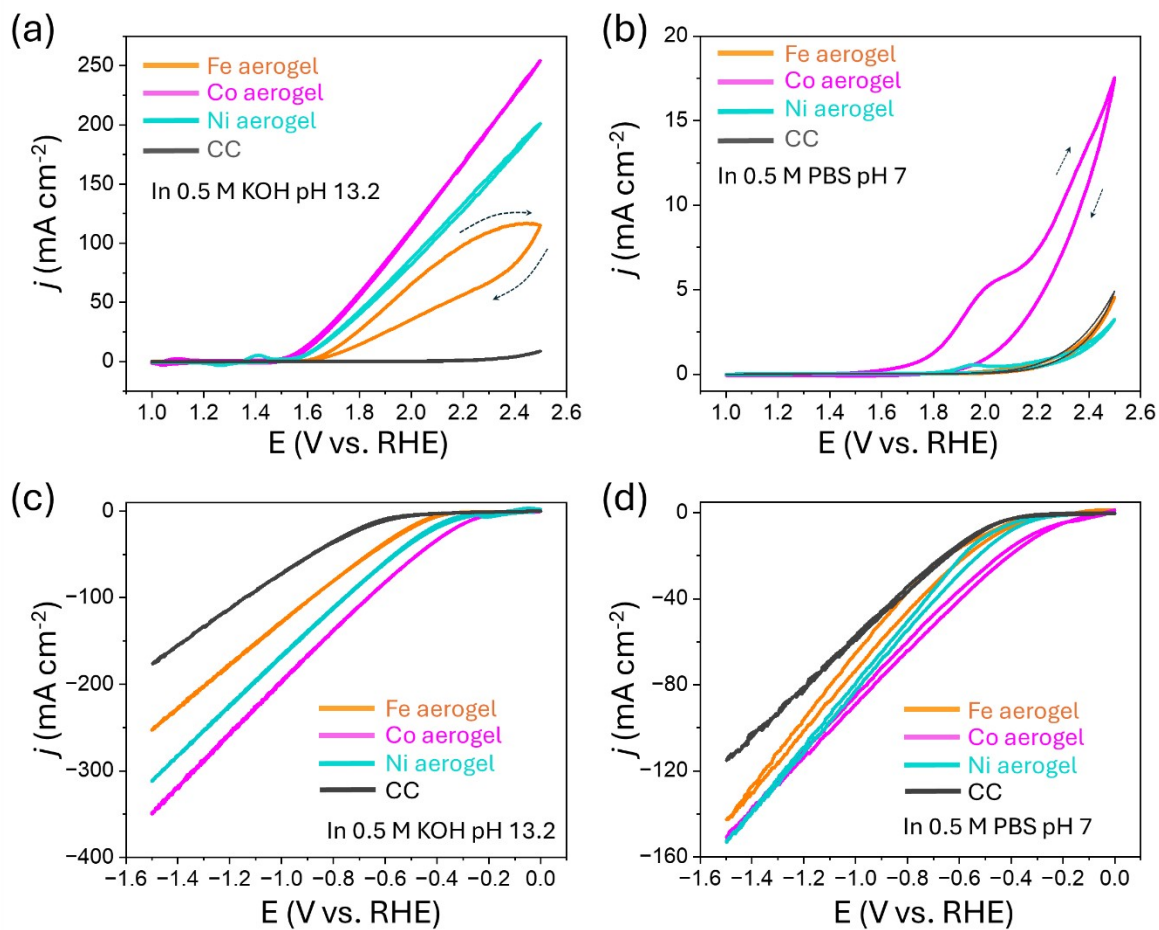

**Figure S5.** Cyclic voltammograms ( $v = 5 \text{ mV s}^{-1}$ ; 3<sup>rd</sup> scan) without  $iR_s$  correction applied of as-prepared catalysts of OER (a) in 0.5 M KOH (pH = 13.2) and (b) in 0.5 M PBS (pH = 7) and of HER (c) in 0.5 M KOH (pH = 13.2) and (d) in 0.5 M PBS (pH = 7).

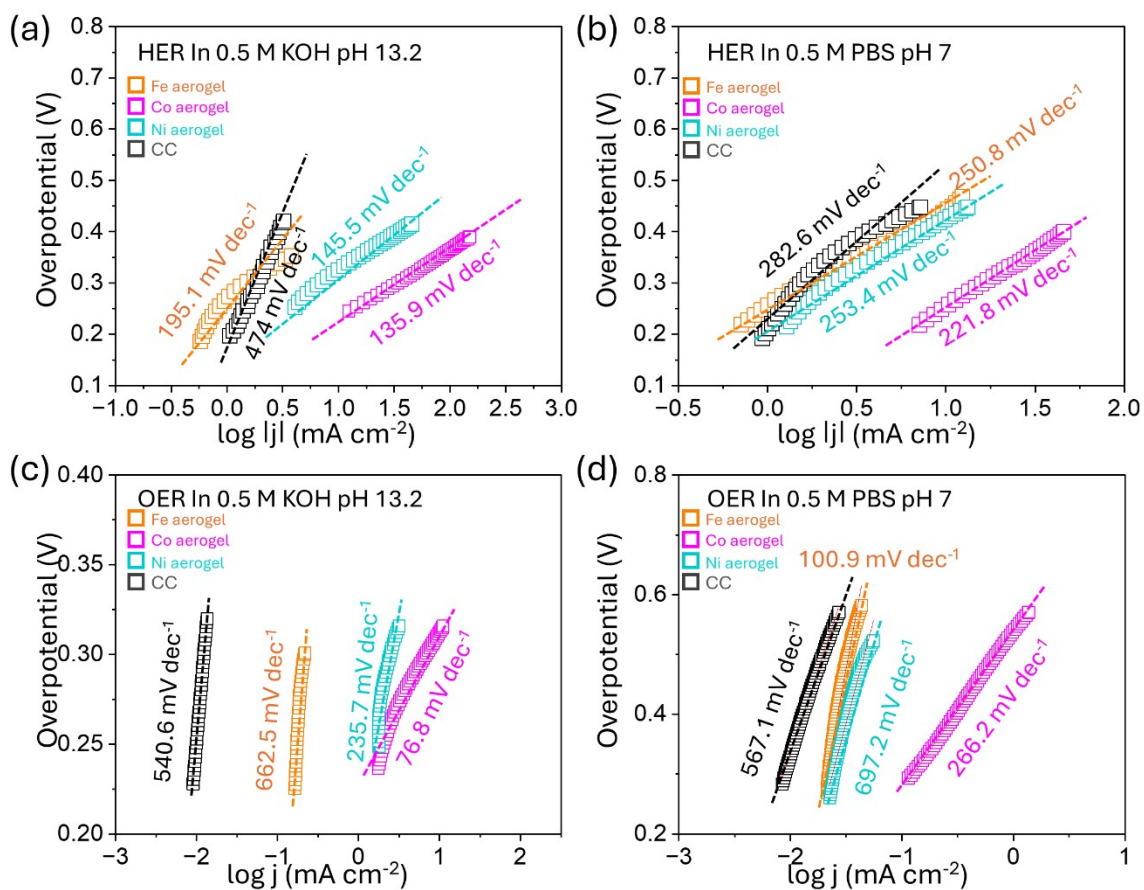

**Figure S6.** Tafel slopes of as-prepared catalysts of HER (a) in 0.5 M KOH (pH = 13.2) and (b) in 0.5 M PBS (pH = 7) and of OER (c) in 0.5 M KOH (pH = 13.2) and (d) in 0.5 M PBS (pH = 7).

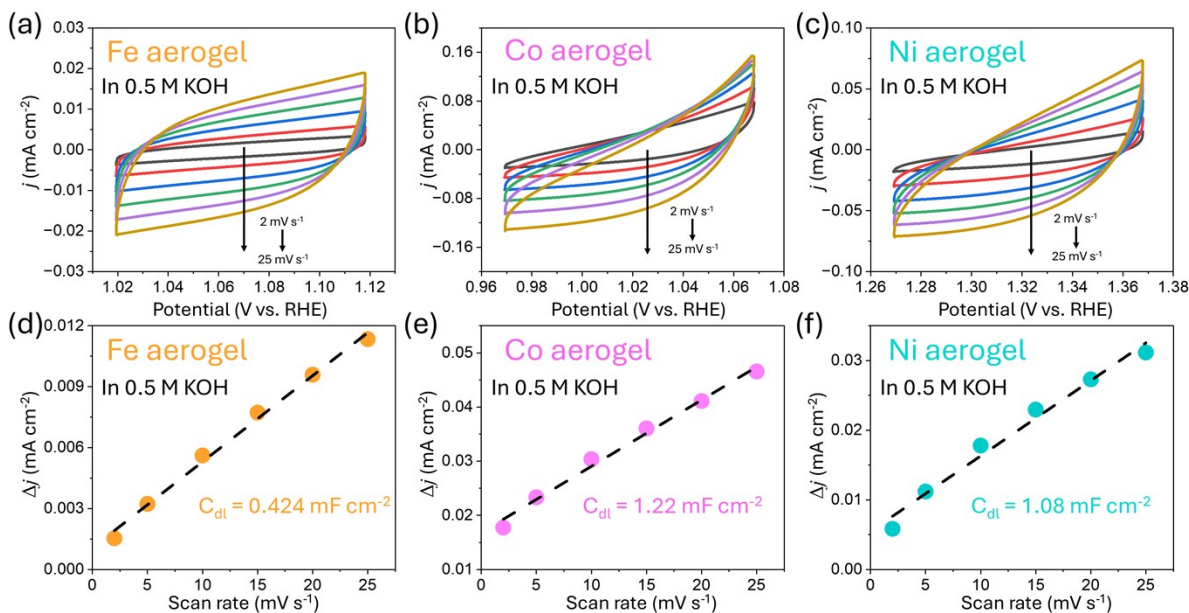

**Figure S7.** CV curves of as-prepared catalysts recorded at different scan rates (2; 5; 10; 15; 20; and 25  $\text{mV s}^{-1}$ ) in the non-faradaic potential range for (a) Fe aerogel; (b) Co aerogel; and (c) Ni aerogel. Corresponding double-layer capacitance for (d) Fe aerogel; (e) Co aerogel; and (f) Ni aerogel. Note: Electrolyte is 0.5 M KOH (pH = 13.2). Potentials are not corrected for ohmic losses. Currents are normalized to the geometric surface area of the electrodes ( $1 \text{ cm}^2$ ).

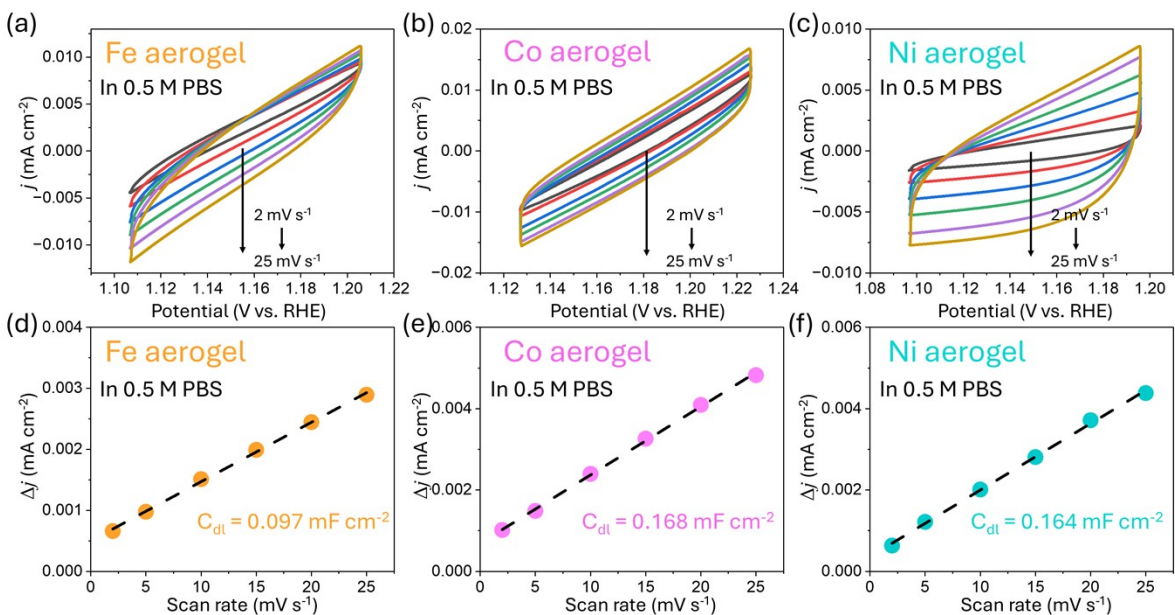

**Figure S8.** CV curves of as-prepared catalysts recorded at different scan rates (2; 5; 10; 15; 20; and 25 mV s<sup>-1</sup>) in the non-faradaic potential range for (a) Fe aerogel; (b) Co aerogel; and (c) Ni aerogel. Corresponding double-layer capacitance for (d) Fe aerogel; (e) Co aerogel; and (f) Ni aerogel. Note: Electrolyte is 0.5 M PBS (pH = 7). Potentials are not corrected for ohmic losses. Currents are normalized to the geometric surface area of the electrodes (1 cm<sup>2</sup>).

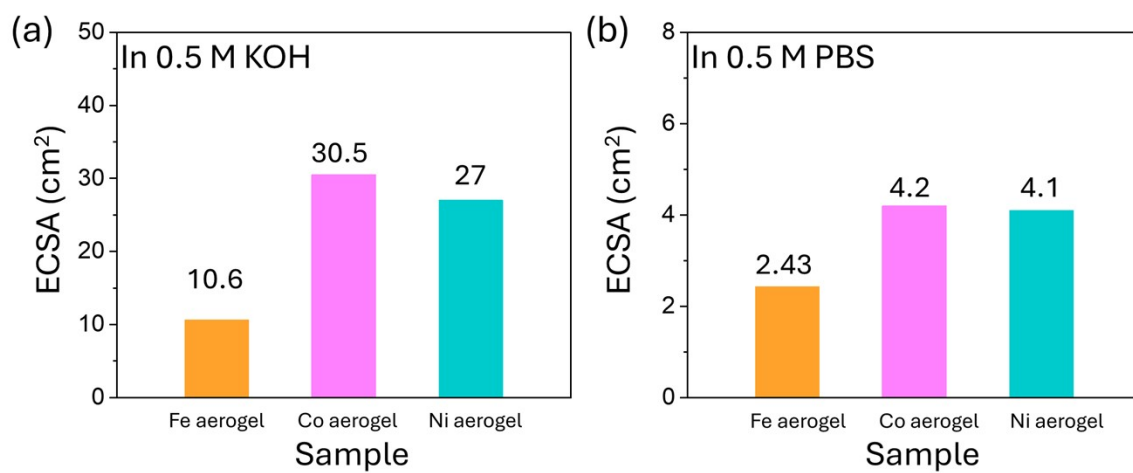

**Figure S9.** Electrochemical active surface area of as prepared catalysts in (a) 0.5 M KOH and (b) 0.5 M PBS.

**Table S1.** BET adsorption-desorption parameters of as-prepared catalysts.

| Sample     | Adsorption                       |                    |                   | Desorption                       |                    |                   |
|------------|----------------------------------|--------------------|-------------------|----------------------------------|--------------------|-------------------|
|            | Surface area (m <sup>2</sup> /g) | Pore volume (cc/g) | Pore diameter (Å) | Surface area (m <sup>2</sup> /g) | Pore volume (cc/g) | Pore diameter (Å) |
| Fe aerogel | 94.128                           | 0.128              | 30.001            | 102.341                          | 0.131              | 37.730            |
| Co aerogel | 134.461                          | 0.176              | 16.945            | 141.002                          | 0.178              | 38.065            |
| Ni aerogel | 103.382                          | 0.184              | 9.993             | 113.964                          | 0.197              | 38.193            |

**Table S2.** The fitted parameters of Nyquist plot of the as-prepared catalysts in OER with alkaline electrolyte.

| OER      | In 0.5 M KOH (pH = 13.2) |            |            |              |
|----------|--------------------------|------------|------------|--------------|
|          | @1.52 V vs. RHE          |            |            |              |
|          | Fe aerogel               | Co aerogel | Ni aerogel | Carbon cloth |
| $R_s$    | 3.4                      | 3.45       | 3.53       | 4.9          |
| $R_{tr}$ | 201.8                    | 2          | 9          |              |
| CPE1-T   | 0.0015                   | 0.00058    | 0.0019     |              |
| CPE1-P   | 0.94                     | 0.7        | 0.65       |              |
| $R_{ct}$ | 7855                     | 48         | 189        |              |
| CPE2-T   | 0.001644                 | 0.000067   | 0.00084    |              |
| CPE2-P   | 0.9                      | 0.961      | 0.934      |              |

**Table S3.** The fitted parameters of Nyquist plot of the as-prepared catalysts in OER with neutral electrolyte.

| OER      | In 0.5 M PBS (pH = 7) |            |            |              |
|----------|-----------------------|------------|------------|--------------|
|          | @1.31 V vs. RHE       |            |            |              |
|          | Fe aerogel            | Co aerogel | Ni aerogel | Carbon cloth |
| $R_s$    | 6.11                  | 6.53       | 7.03       | 6.95         |
| $R_{tr}$ | 190                   | 140        | 240        |              |
| CPE1-T   | 0.0002                | 0.00029    | 0.00091    |              |
| CPE1-P   | 0.89                  | 0.5        | 0.72       |              |
| $R_{ct}$ | 8000                  | 630        | 1700       |              |
| CPE2-T   | 0.00024549            | 0.0002549  | 0.00018    |              |
| CPE2-P   | 0.88515               | 0.86       | 0.83       |              |

**Table S4.** The fitted parameters of Nyquist plot of the as-prepared catalysts in HER with alkaline electrolyte.

| HER      | In 0.5 M KOH (pH = 13.2) |            |            |              |
|----------|--------------------------|------------|------------|--------------|
|          | @-0.3 V vs. RHE          |            |            |              |
|          | Fe aerogel               | Co aerogel | Ni aerogel | Carbon cloth |
| $R_s$    | 3.38                     | 3.02       | 2.9        | 4.24         |
| $R_{tr}$ | 0.25                     | 0.75       | 0.85       |              |
| CPE1-T   | 0.007                    | 0.005      | 0.00085    |              |
| CPE1-P   | 0.67                     | 0.55       | 0.78       |              |
| $R_{ct}$ | 28.55                    | 2.89       | 23.15      |              |
| CPE2-T   | 0.018                    | 0.00037    | 0.014      |              |
| CPE2-P   | 0.8524                   | 0.96524    | 0.914      |              |

**Table S5.** The fitted parameters of Nyquist plot of the as-prepared catalysts in HER with neutral electrolyte.

| HER      | In 0.5 M PBS (pH = 7) |            |            |              |
|----------|-----------------------|------------|------------|--------------|
|          | @-0.5 V vs. RHE       |            |            |              |
|          | Fe aerogel            | Co aerogel | Ni aerogel | Carbon cloth |
| $R_s$    | 5.78                  | 6.23       | 5.94       | 7.3          |
| $R_{tr}$ | 0.7                   | 0.5        | 0.55       |              |
| CPE1-T   | 0.01                  | 0.001      | 0.0005     |              |
| CPE1-P   | 0.8                   | 0.75       | 0.827      |              |
| $R_{ct}$ | 7.85                  | 3.9        | 3.97       |              |
| CPE2-T   | 0.01                  | 0.014034   | 0.00025    |              |
| CPE2-P   | 0.8694                | 0.552      | 0.92721    |              |

**Table S6. Performance comparison of different reported Co-based catalysts for OER in alkaline electrolyte.**

| No. | Catalyst                                                          | Electrolyte | Tafel slope (mV dec <sup>-1</sup> ) | OER Overpotential at 100 mA cm <sup>-2</sup> (mV) | References                            |
|-----|-------------------------------------------------------------------|-------------|-------------------------------------|---------------------------------------------------|---------------------------------------|
|     | Co aerogel                                                        | 0.5 M KOH   | 76.8                                | 390                                               | This work                             |
|     | FePCoMo <sub>2</sub> S <sub>4</sub>                               | 1.0 M KOH   | 96                                  | 390                                               | Zhou et al. 2026 <sup>1</sup>         |
|     | VCoSe                                                             | 1.0 M KOH   | 51.6                                | 420                                               | Sahu et al. 2025 <sup>2</sup>         |
|     | Co-h-MoO <sub>3</sub>                                             | 1.0 M KOH   | 102.02                              | 359                                               | Wang et at. 2025 <sup>3</sup>         |
|     | Co-a-MoO <sub>3</sub>                                             | 1.0 M KOH   | 112.38                              | 463                                               | Wang et at. 2025 <sup>3</sup>         |
|     | Co/GC                                                             | 1.0 M KOH   | 96                                  | 460                                               | Vijayarangan et al. 2025 <sup>4</sup> |
|     | CuS/Co <sub>3</sub> O <sub>4</sub> /C <sub>3</sub> N <sub>4</sub> | 1.0 M KOH   | 79                                  | 410                                               | Ahmed et al. <sup>5</sup>             |
|     | CuS/Co <sub>3</sub> O <sub>4</sub>                                | 1.0 M KOH   | 101                                 | 530                                               | Ahmed et al. <sup>5</sup>             |
|     | FeNiCo <sub>2</sub> S <sub>4</sub>                                | 1.0 M KOH   | 85                                  | 330                                               | Singla et al. 2025 <sup>6</sup>       |
|     | NiCo <sub>2</sub> S <sub>4</sub>                                  | 1.0 M KOH   | 155                                 | 250                                               | Singla et al. 2025 <sup>6</sup>       |
|     | CuO/ZnCo <sub>2</sub> O <sub>4</sub>                              | 1.0 M KOH   | 70                                  | 510                                               | Bhoj et al. 2025 <sup>7</sup>         |

|                                                      |           |        |     |                                |
|------------------------------------------------------|-----------|--------|-----|--------------------------------|
| ZnCo <sub>2</sub> O <sub>4</sub>                     | 1.0 M KOH | 85     | 630 | Bhoj et al. 2025 <sup>7</sup>  |
| CuCo <sub>2</sub> S <sub>4</sub> /CoVOF <sub>2</sub> | 1.0 M KOH | 189.66 | 340 | Zhang et al. 2025 <sup>8</sup> |
| CuCo <sub>2</sub> S <sub>4</sub> /CoF <sub>2</sub>   | 1.0 M KOH | 73.69  | 350 | Zhang et al. 2025 <sup>8</sup> |
| CuCo <sub>2</sub> S <sub>4</sub> /CoVOF <sub>1</sub> | 1.0 M KOH | 84.88  | 340 | Zhang et al. 2025 <sup>8</sup> |
| CuCo <sub>2</sub> S <sub>4</sub>                     | 1.0 M KOH | 256.92 | 385 | Zhang et al. 2025 <sup>8</sup> |

**Table S7.** Performance comparison of different reported Co-based catalysts for HER in alkaline electrolyte.

| No. | Catalyst                                                          | Electrolyte | Tafel slope (mV dec <sup>-1</sup> ) | HER Overpotential at<br>100 mA cm <sup>-2</sup> (mV) | References                            |
|-----|-------------------------------------------------------------------|-------------|-------------------------------------|------------------------------------------------------|---------------------------------------|
|     | Co aerogel                                                        | 0.5 M KOH   | 135.9                               | 364                                                  | This work                             |
|     | FePCoMo <sub>2</sub> S <sub>4</sub>                               | 1.0 M KOH   | 125                                 | 350                                                  | Zhou et al. 2026 <sup>1</sup>         |
|     | ErPCoMo <sub>2</sub> S <sub>4</sub>                               | 1.0 M KOH   | 118                                 | 310                                                  | Zhou et al. 2026 <sup>1</sup>         |
|     | VCoSe                                                             | 1.0 M KOH   | 94.49                               | 480                                                  | Sahu et al. 2025 <sup>2</sup>         |
|     | Co-h-MoO <sub>3</sub>                                             | 1.0 M KOH   | 116.22                              | 130                                                  | Wang et at. 2025 <sup>3</sup>         |
|     | Co-a-MoO <sub>3</sub>                                             | 1.0 M KOH   | 124.62                              | 235                                                  | Wang et at. 2025 <sup>3</sup>         |
|     | CoB                                                               | 1.0 M KOH   | 101                                 | 270                                                  | Sirichandana et al. 2025 <sup>9</sup> |
|     | CuS/Co <sub>3</sub> O <sub>4</sub> /C <sub>3</sub> N <sub>4</sub> | 1.0 M KOH   | 89                                  | 490                                                  | Ahmed et al. <sup>5</sup>             |
|     | CuS/Co <sub>3</sub> O <sub>4</sub>                                | 1.0 M KOH   | 118                                 | 700                                                  | Ahmed et al. <sup>5</sup>             |
|     | FeNiCo <sub>2</sub> S <sub>4</sub>                                | 1.0 M KOH   | 122                                 | 300                                                  | Singla et al. 2025 <sup>6</sup>       |
|     | NiCo <sub>2</sub> S <sub>4</sub>                                  | 1.0 M KOH   | 148                                 | 340                                                  | Singla et al. 2025 <sup>6</sup>       |
|     | CuCo <sub>2</sub> S <sub>4</sub> /CoVOF <sub>2</sub>              | 1.0 M KOH   | 189.66                              | 320                                                  | Zhang et al. 2025 <sup>8</sup>        |
|     | CuCo <sub>2</sub> S <sub>4</sub> /CoF <sub>2</sub>                | 1.0 M KOH   | 176.92                              | 295                                                  | Zhang et al. 2025 <sup>8</sup>        |

|                                                      |           |        |     |                                |
|------------------------------------------------------|-----------|--------|-----|--------------------------------|
| CuCo <sub>2</sub> S <sub>4</sub> /CoVOF <sub>1</sub> | 1.0 M KOH | 176.77 | 270 | Zhang et al. 2025 <sup>8</sup> |
| CuCo <sub>2</sub> S <sub>4</sub>                     | 1.0 M KOH | 248.39 | 250 | Zhang et al. 2025 <sup>8</sup> |
| Co <sub>3</sub> O <sub>4</sub> @NF                   | 1.0 M KOH | 163.9  | 540 | Yang et al. 2025 <sup>10</sup> |

## References

- 1 S. Zhou, Y. Ding, D. Li, G. Zhang, C. Ying, K. Li, Y. Sun, Y. Hong and Y. Li, *New Journal of Chemistry*, DOI:10.1039/d5nj04601g.
- 2 A. Sahu, M. Sadangi and J. N. Behera, *Sustain. Energy Fuels*, 2025, 9, 2718–2728.
- 3 Y. Wang, W. Shang, E. Xiu-Tian-Feng, L. Zeng, X. Jia, N. Wang and Z. Jia, *New Journal of Chemistry*, 2025, 49, 9344–9353.
- 4 M. Vijayarangan, M. Sangamithirai, V. Ashok, J. Jayabharathi and V. Thanikachalam, *Catal. Sci. Technol.*, 2025, 15, 3736–3752.
- 5 I. Ahmed, Z. Abbas and S. M. Mobin, *J. Mater. Chem. A Mater.*, 2025, 13, 8691–8705.
- 6 G. Singla, M. Mahajan, S. N. Bhange and V. Kashyap, *New Journal of Chemistry*, 2025, 49, 10056–10064.
- 7 P. K. Bhoj, D. M. Ulisso, J. B. Yadav, T. D. Dongale, B. R. Sathe, H. Bae, P. Mane, J. S. Ha, I. W. P. Chen, J. Heo, J. Y. Chang and A. V. Ghule, *J. Mater. Chem. A Mater.*, 2025, 13, 16981–16994.
- 8 B. Zhang, Y. Zhao, X. Li, H. Zhou, X. X. Zhao, R. Zhao and F. Wu, *RSC Adv.*, 2025, 15, 19443–19455.
- 9 B. Sirichandana, R. Silviya, S. V. Bhat, N. Patel and G. Hegde, *Nanoscale Adv.*, 2025, 7, 4056–4066.
- 10 G. Yang, D. Fang, Y. Lin, W. Wang, Y. Fu, D. Gao, Y. Mao, X. Wang and J. Li, *J. Mater. Chem. A Mater.*, 2025, 13, 17920–17931.
